# Supplementary material
Source: PubMed Central journal article supplement (PMC4916017)
Supplement: NIHMS780556-supplement-Supp_Fig_S1.pdf [file NIHMS780556-supplement-Supp_Fig_S1.pdf]

# Global SUMOylation facilitates the multimodal neuroprotection afforded by quercetin against the deleterious effects of oxygen/glucose deprivation and the restoration of oxygen/glucose

Yang-ja Lee, Joshua D. Bernstock, Nandakumar Nagaraja<sup>1</sup>, Brian Ko, John M. Hallenbeck

Stroke Branch, National Institute of Neurological Disorders and Stroke, National Institutes of Health (NINDS/NIH), Bethesda, MD, USA

*Suppl. Figure 1.*

## SHSY5Y

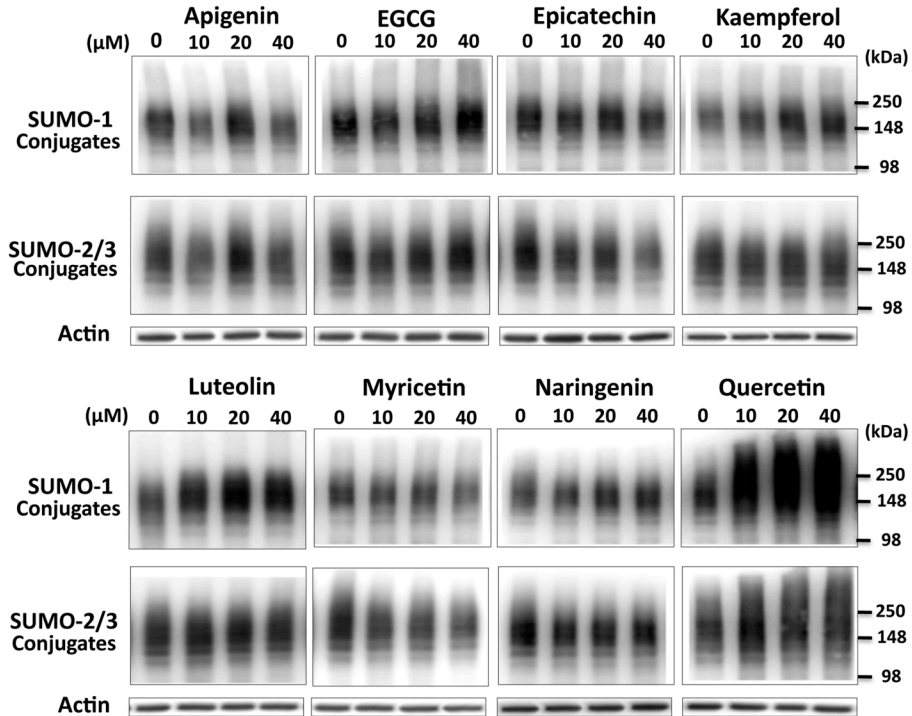

## Rat cortical neurons

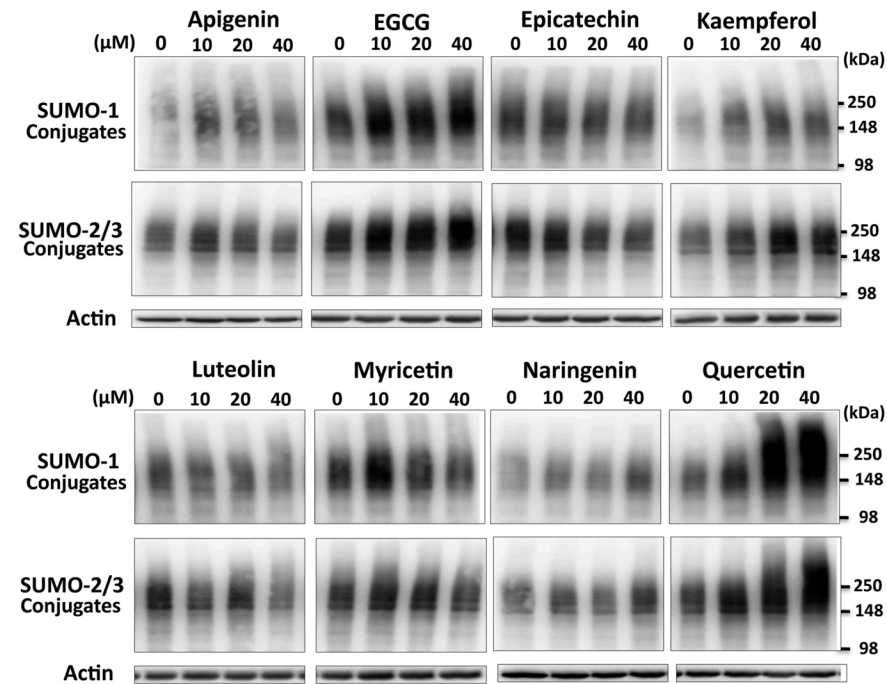

*Suppl. Figure 1. Effects of various flavonoids on SUMO conjugation (both SUMO-1 and SUMO-2,3) in SHSY5Y cells and rat cortical neurons.* Representative immunoblots of SUMO-1 and SUMO-2,3 conjugates in SHSY5Y cells and rat cortical neurons which were treated with the indicated flavonoids at various concentrations (0, 10, 20, 40  $\mu\text{M}$ ) for 16 hr.
